# Supplementary material
Source: Springer Nature journal article supplement (https://www.springermedizin.de/resource/supplementary/12885_2013_4216_MOESM1_ESM.pdf/9465852)

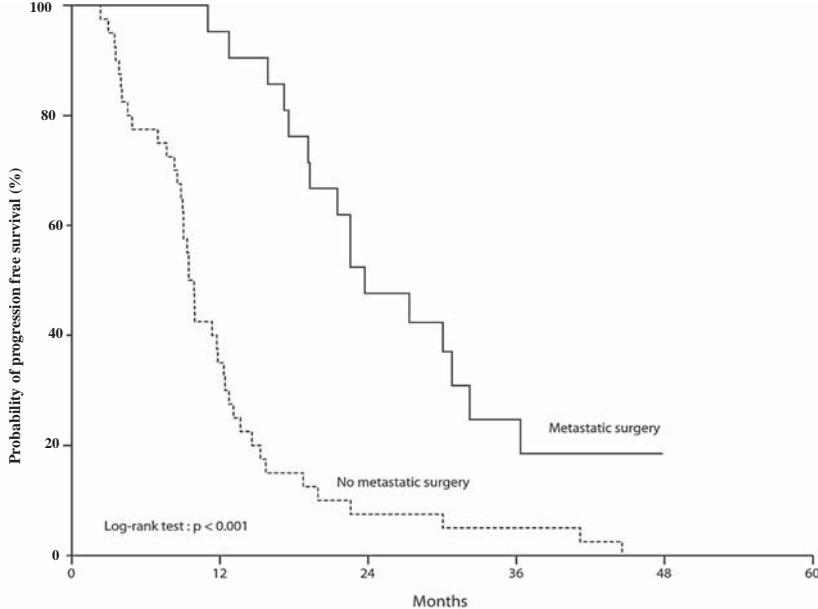

No. at risk

Metastatic surgery

21

20

10

4

2

No metastatic surgery

40

14

3

2

0

Supplement: MOESM1 [file 9465852]
